# Supplementary material
Source: PubMed Central journal article supplement (PMC3073582)
Supplement: NIHMS275464-supplement-2_si_002.pdf [file NIHMS275464-supplement-2_si_002.pdf]

**Table S1. 10 LC-MS injections to characterize Hpt site-specific glycosylation status**

| LC-MS Runs | Sample                          | Experiment                       | Purposes/Results                                                                                                                                                                                                                                                          |
|------------|---------------------------------|----------------------------------|---------------------------------------------------------------------------------------------------------------------------------------------------------------------------------------------------------------------------------------------------------------------------|
| 1-3        | Hpt tryptic digest              | Data dependent LC-CID/ETD-MS/MS  | Glycopeptide precursors m/z(s) determination, ETD-MS/MS sequencing of peptides moiety (examples include T1-03 and T3-07), CID-MS/MS for glycan (T1-01, T1-05, T1-06, T1-07, T2 glycan composition, T3-01, T3-02, T3-03, T3-04, T3-05, T3-06, T3-08)                       |
| 4-7        | Hpt tryptic digest              | Targeted LC-CID/ETD-MS/MS        | Targeted CID-MS/MS for low abundance glycopeptides T1-02, T1-04, T3-07 and T3-09.<br>Targeted ETD-MS/MS for abundant T2 glycopeptides T2-01 and T2-02.<br>Targeted CID-MS/MS on fucosylated glycopeptides to confirm the position-specific fragments (both B and Y ions). |
| 8-10       | PNGase-F treated tryptic digest | Data dependent PLOT LC-CID-MS/MS | Site occupancy for T3                                                                                                                                                                                                                                                     |

**Table S2. Theoretical mass and m/z matrix for the identified site-specific glycoforms**

| Glycopeptide | Peptide mass | Glycoform <sup>#</sup> | Glycan Structure*   | Glycoform mass | Glycoform m/z |        |        |
|--------------|--------------|------------------------|---------------------|----------------|---------------|--------|--------|
|              |              |                        |                     |                | z=3           | z=4    | z=5    |
| T1           | 2681.1       | T1-01                  | 2-1S-0F             | 4595.8         | 1532.9        | 1149.9 | 920.2  |
|              |              | T1-02                  | 2-1S-1F             | 4741.9         | 1581.6        | 1186.5 | 949.4  |
|              |              | T1-03                  | 2-2S-0F             | 4887.0         | 1630.0        | 1222.8 | 978.4  |
|              |              | T1-04                  | 2-2S-1F             | 5033.2         | 1678.7        | 1259.3 | 1007.6 |
|              |              | T1-05                  | 3-2S-0F             | 5252.4         | 1751.8        | 1314.1 | 1051.5 |
|              |              | T1-06                  | 3-3S-0F             | 5543.6         | 1848.9        | 1386.9 | 1109.7 |
|              |              | T1-07                  | 3-3S-1F             | 5689.8         | 1897.6        | 1423.4 | 1139.0 |
| T2           | 1459.6       | T2-01                  | (2-2S-0F)+(2-1S-0F) | 5580.3         | 1861.1        | 1396.1 | 1117.1 |
|              |              | T2-02                  | (2-2S-0F)+(2-2S-0F) | 5871.6         | 1958.2        | 1468.9 | 1175.3 |
|              |              | T2-03                  | (2-2S-0F)+(3-2S-0F) | 6236.9         | 2080.0        | 1560.2 | 1248.4 |
|              |              | T2-04                  | (2-2S-0F)+(3-2S-1F) | 6383.0         | 2128.7        | 1596.8 | 1277.6 |
|              |              | T2-05                  | (2-2S-0F)+(3-3S-0F) | 6528.1         | 2177.0        | 1633.0 | 1306.6 |
|              |              | T2-06                  | (2-2S-0F)+(3-3S-1F) | 6674.3         | 2225.8        | 1669.6 | 1335.9 |
|              |              | T2-07                  | (2-2S-0F)+(4-3S-0F) | 6893.5         | 2298.8        | 1724.4 | 1379.7 |
|              |              | T2-08                  | (2-2S-0F)+(4-3S-1F) | 7039.6         | 2347.5        | 1760.9 | 1408.9 |
|              |              | T2-09                  | (2-2S-0F)+(4-4S-0F) | 7184.7         | 2395.9        | 1797.2 | 1437.9 |
|              |              | T2-10                  | (2-2S-0F)+(4-4S-1F) | 7330.9         | 2444.6        | 1833.7 | 1467.2 |
| T3           | 1796.1       | T3-01                  | 2-1S-0F             | 3710.8         | 1237.9        | 928.7  | 743.2  |
|              |              | T3-02                  | 2-2S-0F             | 4002.1         | 1335.0        | 1001.5 | 801.4  |
|              |              | T3-03                  | 2-2S-1F             | 4148.2         | 1383.7        | 1038.1 | 830.6  |
|              |              | T3-04                  | 3-2S-0F             | 4367.4         | 1456.8        | 1092.9 | 874.5  |
|              |              | T3-05                  | 3-2S-1F             | 4513.6         | 1505.5        | 1129.4 | 903.7  |
|              |              | T3-06                  | 3-3S-0F             | 4658.7         | 1553.9        | 1165.7 | 932.7  |
|              |              | T3-07                  | 3-3S-1F             | 4804.8         | 1602.6        | 1202.2 | 962.0  |
|              |              | T3-08                  | 4-2S-0F             | 4732.7         | 1578.6        | 1184.2 | 947.5  |
|              |              | T3-09                  | 4-3S-0F             | 5024.0         | 1675.7        | 1257.0 | 1005.8 |

<sup>#</sup>, Glycoforms identified on Hpt. The structures of corresponding glycoforms can be found in Table S3.

<sup>\*</sup>, Glycan structure (text format) of corresponding glycoform. The first arabic number represents branching; second arabic number represents sialic acid number, "S" means sialic acid; the third arabic number represents fucose number, "F" means fucose.

**Table S3. Site-specific glycan structures identified on Hpt\***

| T1-01 | T1-02 | T1-03 | T1-04 | T1-05 | T1-06 | T1-07 |
|-------|-------|-------|-------|-------|-------|-------|
|       |       |       |       |       |       |       |
| T2-01 | T2-02 | T2-03 | T2-04 | T2-05 | T2-06 | T2-07 |
|       |       |       |       |       |       |       |
| T2-08 | T2-09 | T2-10 | T3-01 | T3-02 | T3-03 | T3-04 |
|       |       |       |       |       |       |       |
| T3-05 | T3-06 | T3-07 | T3-08 | T3-09 |       |       |
|       |       |       |       |       |       |       |

\* key to symbols can be found in Figure 3.

## Supplementary Material

### Figure Captions

Figure S1. PLOT LC-LTQ-CID/ETD-MS system. (A) Scanning electron micrograph (SEM) of a monolith SPE column; (B) SEM of PLOT column; (C) Schematic representation of electrospray using the 10  $\mu\text{m}$  i.d. PLOT column. (D) PicoClear tee allowed quick sample loading while minimizing band broadening. The 10-port valve was first set in the loading position, with tee **a** serving as splitter and tee **b** as connector. Sample was loaded onto the SPE column while salts and other ESI deleterious components were directed to waste. After loading, both the sample injection valve and 10-port valve were switched to the separation position (dashed line, Figure S1), and the SPE column was now positioned to be in-line with the PLOT separation column. The tees were reversed with tee **a** now serving as connector, while tee **b** acted as splitter.

Figure S2. Glycoform identification on glycopeptide T3. (A) ETD-MS/MS generated peptide fragments c and z' ions. (B) CID-MS/MS generated oxonium ions and glycopeptide fragments. (C) Averaged base peak chromatogram contained all the glycans on glycopeptide T3. m/z 1527.2 is a co-eluting nonglycosylated peptide. NL: normalized level. Key to symbols can be found in Figure 3.

## Supplementary Material

### Figure Captions

Figure S3. Glycan compositions identified on glycopeptide T2. The empty circle represents charge state +5, while the filled circle represents charge state +4. NL: normalized level. Key to symbols can be found in Figure 3.

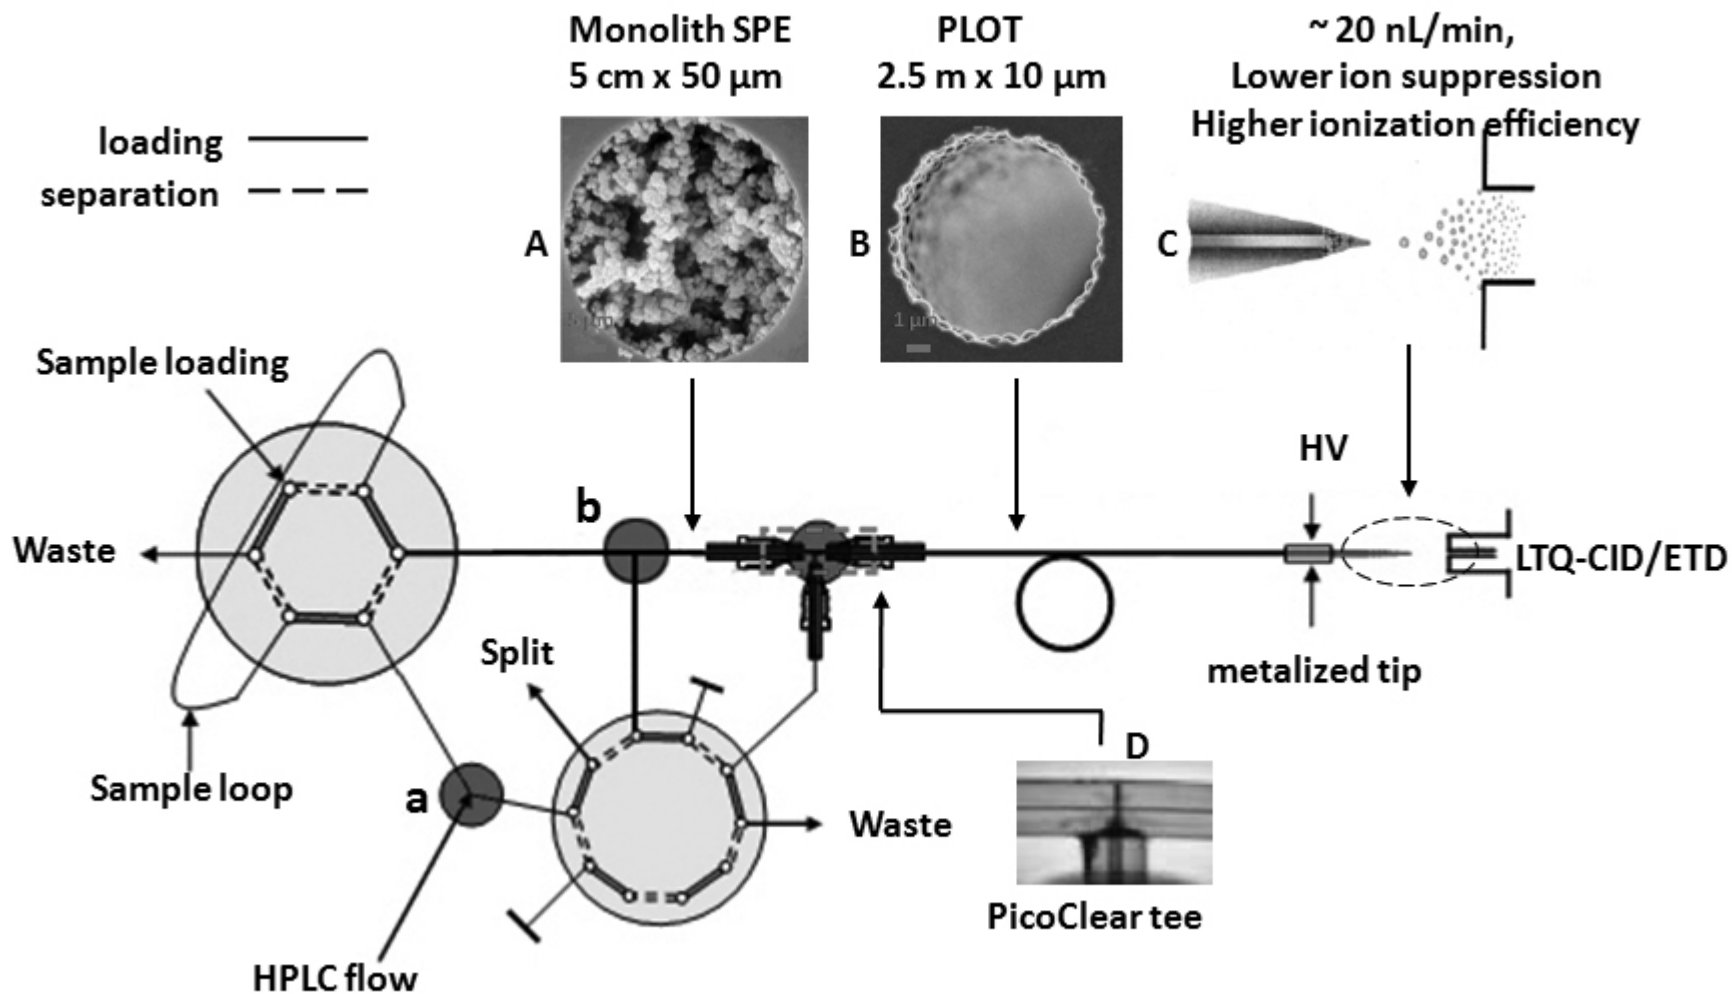

**Figure S1**

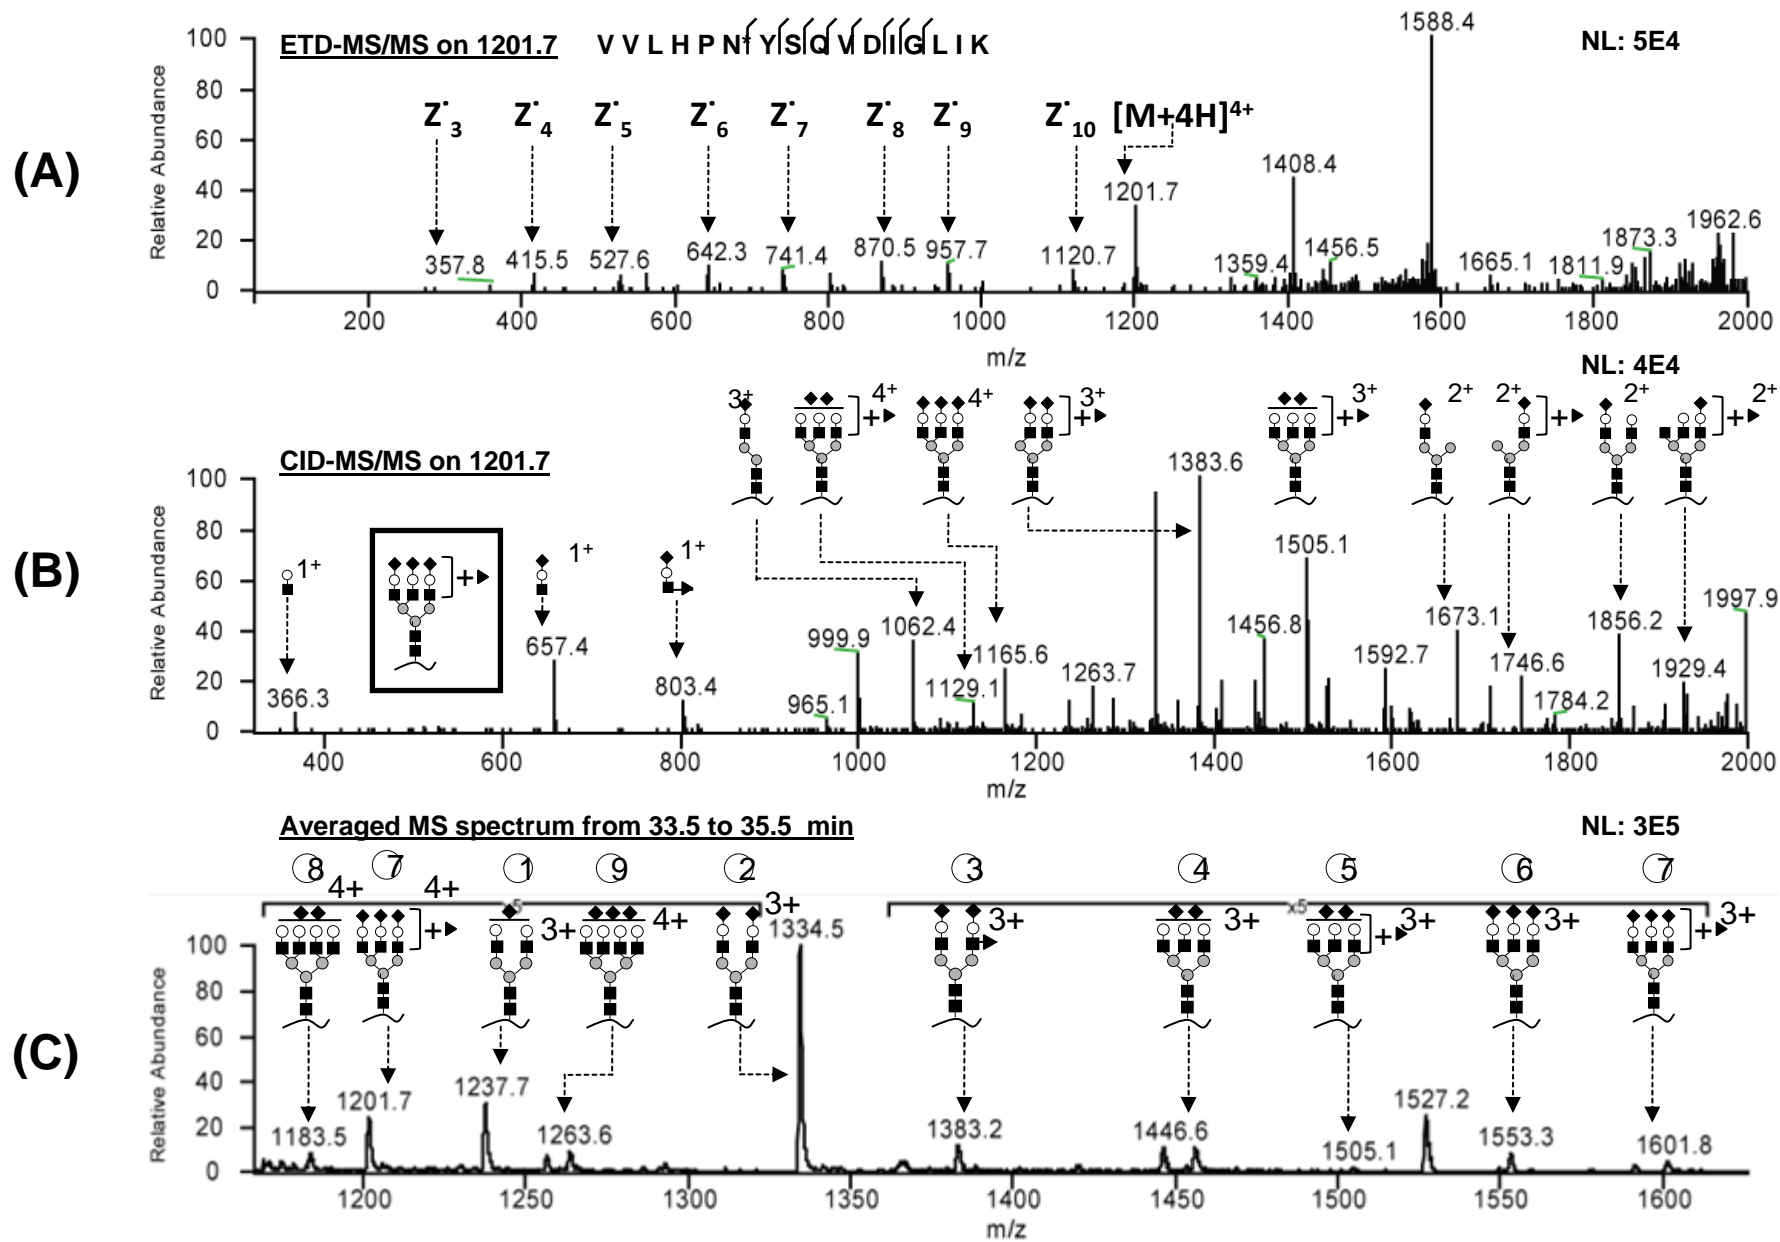

**Figure S2**

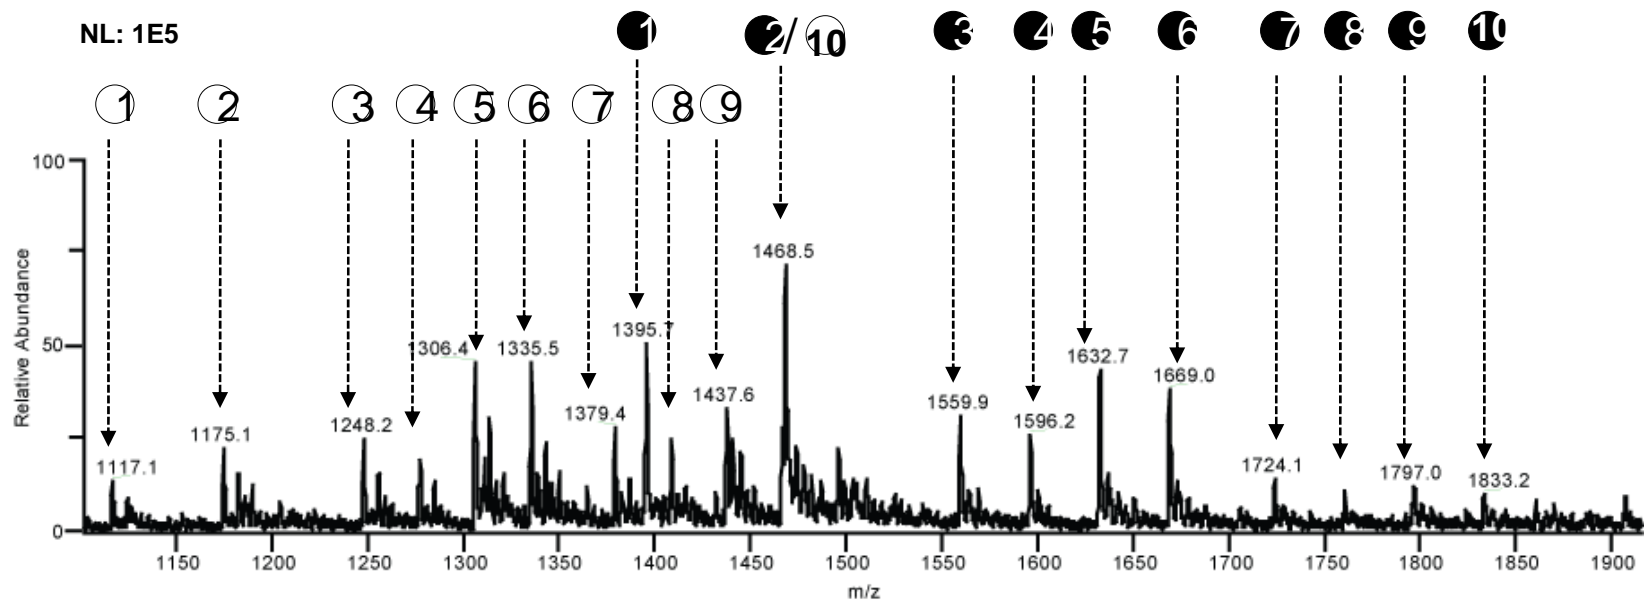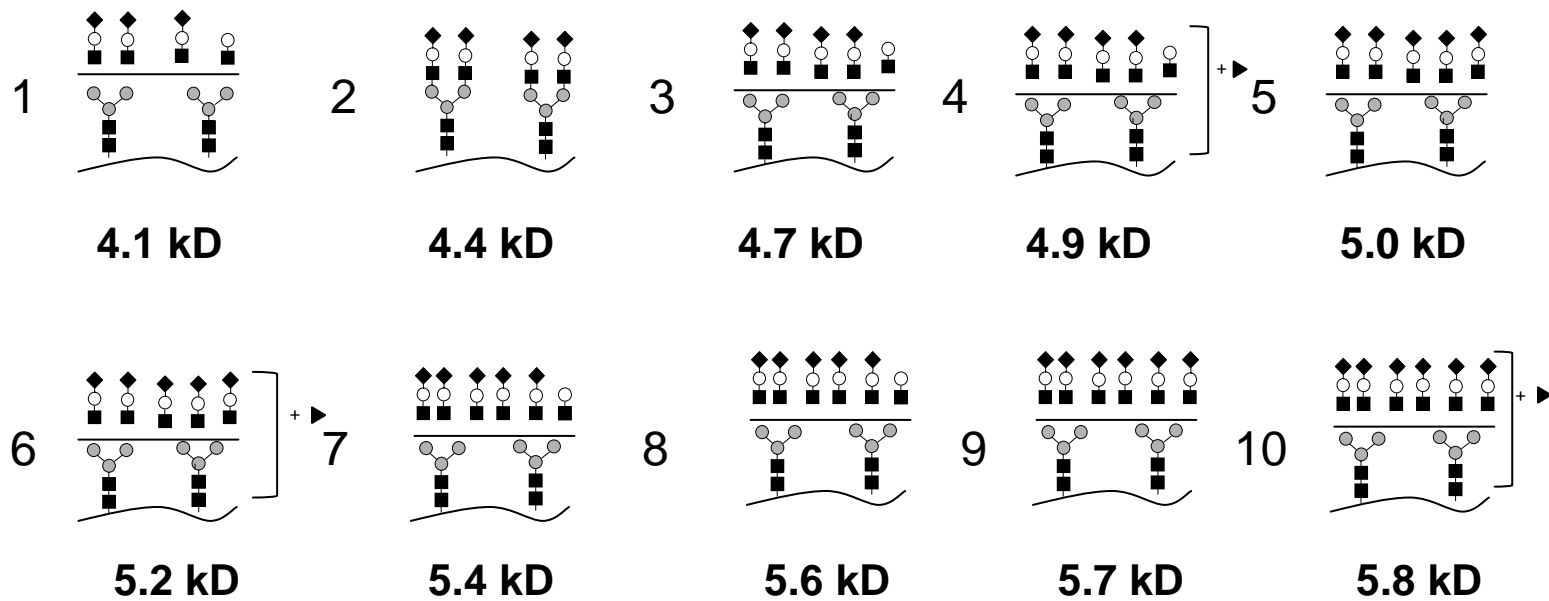

Figure S3
