# Supplementary material
Source: PubMed Central journal article supplement (PMC3073582)

## Platform for Characterization of Site-Specific Glycosylation

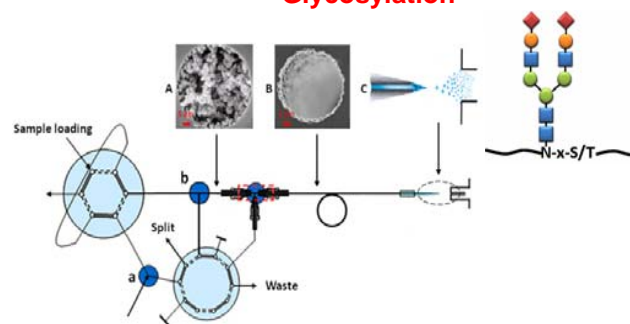

Supplement: NIHMS275464-supplement-1_si_001.pdf [file NIHMS275464-supplement-1_si_001.pdf]
